# Supplementary figures and images for: Valvular disease burden in the modern era of percutaneous and surgical interventions: the UK Biobank
Source: PubMed Central journal article supplement — Open Heart. 2022 Sep 14;9(2):e002039. doi: 10.1136/openhrt-2022-002039 (PMC9476134; doi:10.1136/openhrt-2022-002039), 2022-09-14

**A.**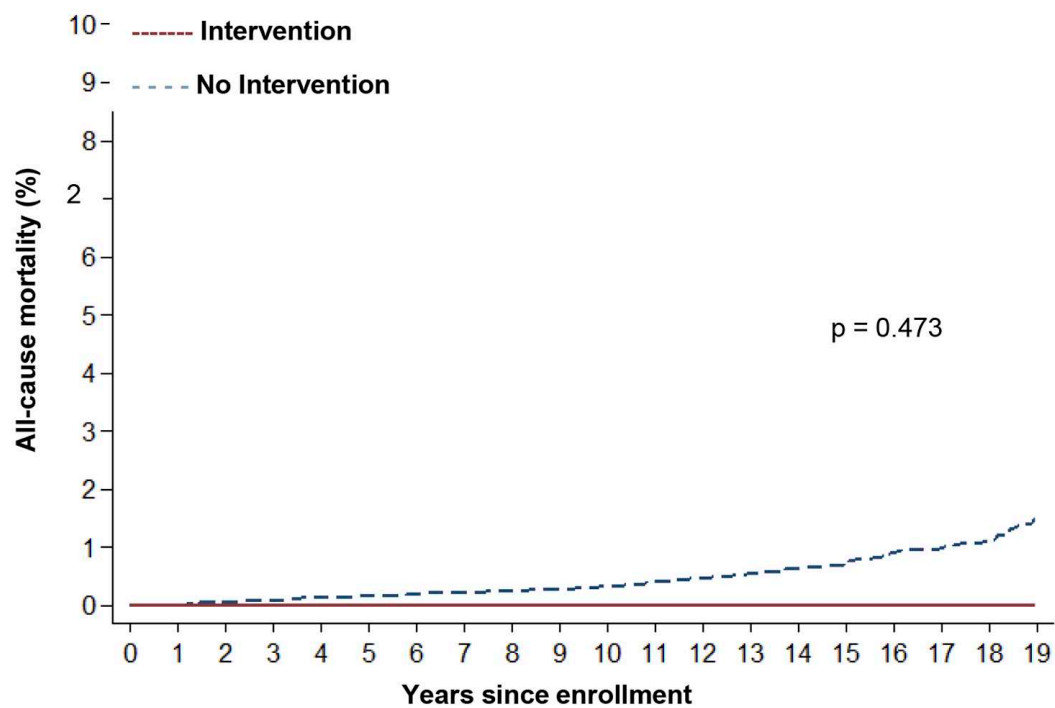**B.**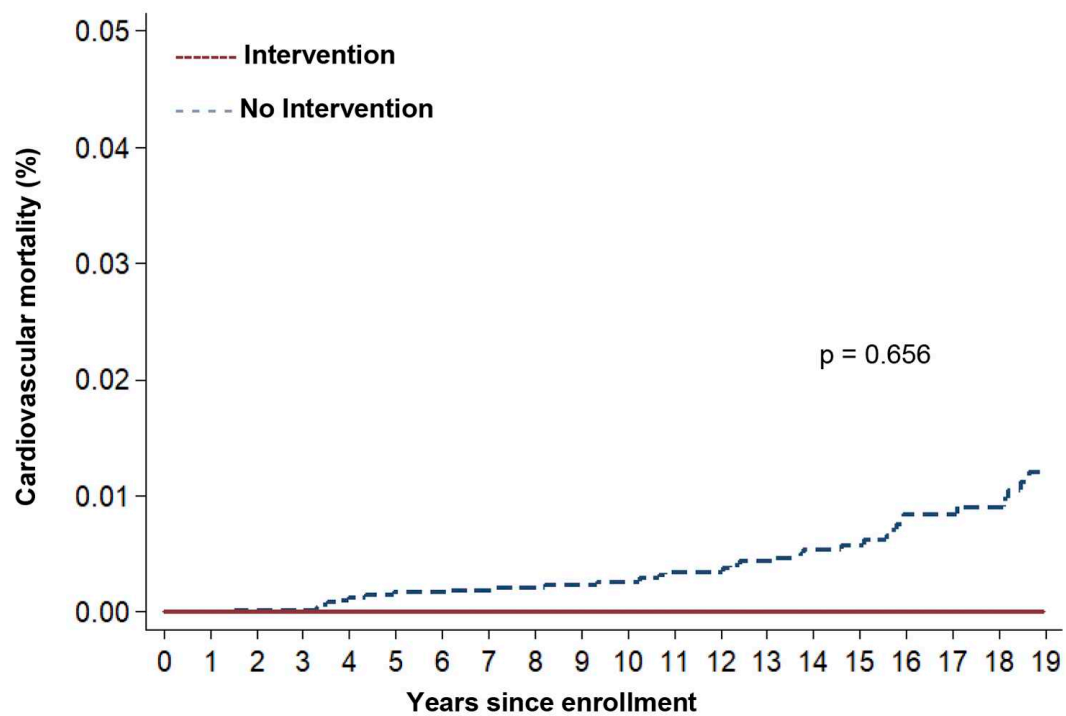

Supplement: openhrt-2022-002039supp002.pdf [file openhrt-2022-002039supp002.pdf]
